# Supplementary material for: TDP-43 as a possible biomarker for frontotemporal lobar degeneration: a systematic review of existing antibodies
Source: PubMed Central journal article supplement (PMC4380254; doi:10.1186/s40478-015-0195-1), 2015-04-01
Supplement: 40478_2015_195_MOESM1_ESM.pdf [file 40478_2015_195_MOESM1_ESM.pdf]

**Additional file 1.pdf**

**Table S1** List of antibodies that are selected based on their ability to detect TDP-43 pathology, reported once

**Table S2** Alphabetical list of well-characterized commercially available antibodies within this systematic search.

**Table S1** List of antibodies that are selected based on their ability to detect TDP-43 pathology, reported once

| Antibody (Epitope / Immunogen)  | Manufacturer/First report | Clonality | Species | Times reported with scores 1-1 | Times reported with scores 0-1 or 1-0 | Times reported with scores 0-0 | Total times scored (n = 19) |
|---------------------------------|---------------------------|-----------|---------|--------------------------------|---------------------------------------|--------------------------------|-----------------------------|
| 5056 (AA 262-391 / R)           | Kwong 2014                | mono      | mouse   | 1                              |                                       | -                              | 1                           |
| 138 (AA 182-261 / R)            | Kwong 2014                | mono      | mouse   | -                              | 1                                     | -                              | 1                           |
| 205 (AA 262-391 / R)            | Kwong 2014                | mono      | mouse   | -                              | 1                                     | -                              | 1                           |
| 241 (AA 262-391 / R)            | Kwong 2014                | mono      | mouse   | -                              | 1                                     | -                              | 1                           |
| 5031 (AA 25-181 / R)            | Kwong 2014                | mono      | mouse   | -                              | 1                                     | -                              | 1                           |
| 5095 (AA 262-391/ R)            | Kwong 2014                | mono      | mouse   | -                              | 1                                     | -                              | 1                           |
| 5195 (AA 394-414 / R)           | Kwong 2014                | mono      | mouse   | -                              | 1                                     | -                              | 1                           |
| RRM1-a (AA 108-116 / P)         | Shodai 2013               | poly      | rabbit  | 1                              | -                                     | -                              | 1                           |
| RRM1-c (AA 167-172 / P)         | Shodai 2013               | poly      | rabbit  | 1                              | -                                     | -                              | 1                           |
| SAB4200224 (pS410 / P)          | Sigma                     | poly      | rabbit  | 1                              | -                                     | -                              | 1                           |
| HPA017284 (AA 232-372 / R)      | Sigma                     | poly      | rabbit  | 1                              | -                                     | -                              | 1                           |
| TIP-TD-P07 (AA 3-12 / P)        | Cosmo Bio                 | poly      | rabbit  | 1                              | -                                     | -                              | 1                           |
| 7A9 (ps409/410; AA 403-414 / P) | Neumann 2009              | mono      | rat     | 1                              | -                                     | -                              | 1                           |
| A2 (pS409/410; AA 404-414 / P)  | Kadokura 2009             | poly      | rabbit  | 1                              | -                                     | -                              | 1                           |
| C-tTDP-43 (AA 394-414 / P)      | Igaz 2009                 | mono      | mouse   | 1                              | -                                     | -                              | 1                           |
| pS379 (AA 375-384 / P)          | Hasegawa 2008             | poly      | rabbit  | 1                              | -                                     | -                              | 1                           |
| pS409 (AA 405-414 / P)          | Hasegawa 2008             | poly      | rabbit  | 1                              | -                                     | -                              | 1                           |
| pS410 (AA 405-414 / P)          | Hasegawa 2008             | poly      | rabbit  | 1                              | -                                     | -                              | 1                           |
| TDPccp (AA 213-219 / P)         | Rohn 2008                 | poly      | rabbit  | 1                              | -                                     | -                              | 1                           |

Antibodies are ordered by publication year, number of double positive reports and alphabetically.

**Table S2** Alphabetical list of well-characterized commercially available antibodies within this systematic search. This requires a known name, epitope, manufacturer, clonality and species

| <b>Antibody (Epitope)</b>                             | <b>Manufacturer/First report</b> | <b>Clonality</b> | <b>Species</b> |
|-------------------------------------------------------|----------------------------------|------------------|----------------|
| <b>10782</b> (AA 203-209 and AA near N-terminus)      | ProteinTech                      | poly             | rabbit         |
| 12892 (AA 288-414)                                    | ProteinTech                      | poly             | rabbit         |
| 1D3 (pS409/410, AA 403-414)                           | Millipore/Neumann 2009           | mono             | mouse          |
| 22309 (pS409/410)                                     | ProteinTech                      | poly             | rabbit         |
| <b>2E2-D3</b> (AA 205-222)                            | Abnova/Novus/Abcam/etc.          | mono             | mouse          |
| 3448S (AA surrounding G400)                           | Cell Signaling Technology        | poly             | rabbit         |
| 60019 (AA 203-209)                                    | ProteinTech                      | mono             | mouse          |
| 3H8 (AA 1-150)                                        | Abcam/Encor/Millipore            | mono             | mouse          |
| ab41881 (AA 350-414)                                  | Abcam                            | poly             | rabbit         |
| ARP38942_T100 (AA 337-386)                            | Aviva                            | poly             | rabbit         |
| H00023435-A01 (AA 1-260)                              | Abnova                           | poly             | mouse          |
| HPA017284 (AA 232-372)                                | Sigma                            | poly             | rabbit         |
| NB110-55376 (AA 350-414)                              | Novus                            | poly             | rabbit         |
| PA5-17011 (AA surrounding G400)                       | ThermoScientific                 | poly             | rabbit         |
| PAB12006 (AA 350-414)                                 | Abnova                           | poly             | rabbit         |
| SAB4200223 (pS409)                                    | Sigma                            | poly             | rabbit         |
| SAB4200224 (pS410)                                    | Sigma                            | poly             | rabbit         |
| T1580 (AA 355-369)                                    | Sigma                            | poly             | rabbit         |
| T1705 (AA 181-198)                                    | Sigma                            | poly             | rabbit         |
| TIP-PTD-M01 (pS409/410; AA 405-414)                   | Cosmo Bio/Inukai 2008            | mono             | mouse          |
| <b>TIP-PTD-P01 &amp; -P02</b> (pS409/410; AA 405-414) | Cosmo Bio/Hasegawa 2008          | poly             | rabbit         |
| TIP-PTD-P05 (pS403/404; AA 398-408)                   | Cosmo Bio/Hasegawa 2008          | poly             | rabbit         |
| TIP-TD-P07 (AA 3-12)                                  | Cosmo Bio                        | poly             | rabbit         |
| TIP-TD-P09 (AA 405-414)                               | Cosmo Bio/Hasegawa 2008          | poly             | rabbit         |

Bold italic antibodies are those which are considered “standard” when studying TDP-43
